# Supplementary material for: Targeting circular RNA-Glra2 alleviates retinal neurodegeneration induced by ocular hypertension
Source: publisher site journal article supplement (doi:10.18632/aging.205108), 2023-10-10
Supplement: Supplementary file [file aging-v15i19-205108-supplementary-material-SD1.pdf]

## SUPPLEMENTARY FIGURES

Subject: hsa\_circ\_0139862 Query: mmu\_circ\_0016226

| Score         | Expect                                                         | Identities   | Gaps      | Strand    |
|---------------|----------------------------------------------------------------|--------------|-----------|-----------|
| 904 bits(489) | 0.0                                                            | 603/660(91%) | 0/660(0%) | Plus/Plus |
| Query 1       | GACTACCGAGTGAACATTTTTCTGAGACAGCAGTGGAAATGATTCACGGCTGGCATAACAGT | 60           |           |           |
| Sbjct 69      | GACTACCGAGTGAATATTTTTCTGAGACAACAGTGGAAATGATTCACGGCTGGCGTACAGT  | 128          |           |           |
| Query 61      | GAGTACCCAGATGATTCCCTGGATTGGATCCCTCAATGTTGGATTTCGATTTGGAAACCG   | 120          |           |           |
| Sbjct 129     | GAGTACCCAGATGACTCCCTGGACTTGGACCCATCCATGCTAGACTCCATTTGGAAACCA   | 188          |           |           |
| Query 121     | GATTTGTTCTTTGCCAATGAAAAGGGTGCCAATTTCCATGATGTCACCACTGACAACAAG   | 180          |           |           |
| Sbjct 189     | GATTTGTTCTTTGCCAATGAGAAGGGTGCCAACCTCCACGATGTCACCACTGACAACAAA   | 248          |           |           |
| Query 181     | TTGTTGCGGATTTCCAAAAATGGCAAAGTGCTCTACAGTATTAGACTCACCTTGACTTTA   | 240          |           |           |
| Sbjct 249     | TTGCTACGGATTTCGAAAAATGGCAAAGTGCTCTACAGTATCAGACTCACCTTGACCTTA   | 308          |           |           |
| Query 241     | TCTTGTTCCAATGGACCTGAAGAAGTTTCCAATGGATGTCCAGACCTGTACAATGCAGCTG  | 300          |           |           |
| Sbjct 309     | TCCTGTCCCATGGACTTGAAGAAGTTTCCGATGGATGTCCAGACCTGTACAATGCAGCTG   | 368          |           |           |
| Query 301     | GAGAGTTTTGGGTACACCATGAATGACCTGATATTTGAGTGGTTAAGTGATGGTCCAGTA   | 360          |           |           |
| Sbjct 369     | GAGAGTTTTGGGTACACGATGAATGACCTGATATTTGAGTGGTTAAGTGATGGTCCAGTG   | 428          |           |           |
| Query 361     | CAAGTTGCTGAAGGACTCACCTTGCCCCAGTTTATTTTGAAGAAGAGAAGGAGCTTGGT    | 420          |           |           |
| Sbjct 429     | CAAGTTGCTGAAGGATTGACCCTGCCCCAGTTTATTTTGAAGAAGAGAAGGAAGACTTGGC  | 488          |           |           |
| Query 421     | TATTGCACAAAGCATTACAACACTGGCAAGTTTACCTGCATTGAGGTCAAGTTTCACCTG   | 480          |           |           |
| Sbjct 489     | TACTGTACAAAGCACTACAACACTGGAAAGTTTACCTGCATTGAGGTCAAGTTTCATCTG   | 548          |           |           |
| Query 481     | GAGCGCCAGATGGGCTACTATTTGATCCAGATGTACATCCCCAGCCTGTTGATAGTCATT   | 540          |           |           |
| Sbjct 549     | GAACGCCAAATGGGATATTATTTGATCCAGATGTACATCCCAAGCCTGCTTATAGTAATT   | 608          |           |           |
| Query 541     | TTGTCCTGGGTCTCCTTTTGGATAAACATGGATGCAGCCCCTGCCAGGGTTGCCCTGGGC   | 600          |           |           |
| Sbjct 609     | TTGTCCTGGGTTTCCTTTTGGATAAATATGGATGCAGCCCCTGCCAGGGTGCCTGGGC     | 668          |           |           |
| Query 601     | ATCACAACAGTCCTGACAATGACTACACAGATTTCAGGTTCCAGGGCATCTCTGCCAAAG   | 660          |           |           |
| Sbjct 669     | ATCACCACAGTCTTAACGATGACCACCCAGATTTCAGGCTCCAGGGCATCTCTGCCAAAG   | 728          |           |           |

**Supplementary Figure 1. Homologous gene comparison of cGla2.** NCBI BLAST was conducted to compare the sequence similarity of cGla2 between human genome and murine genome.

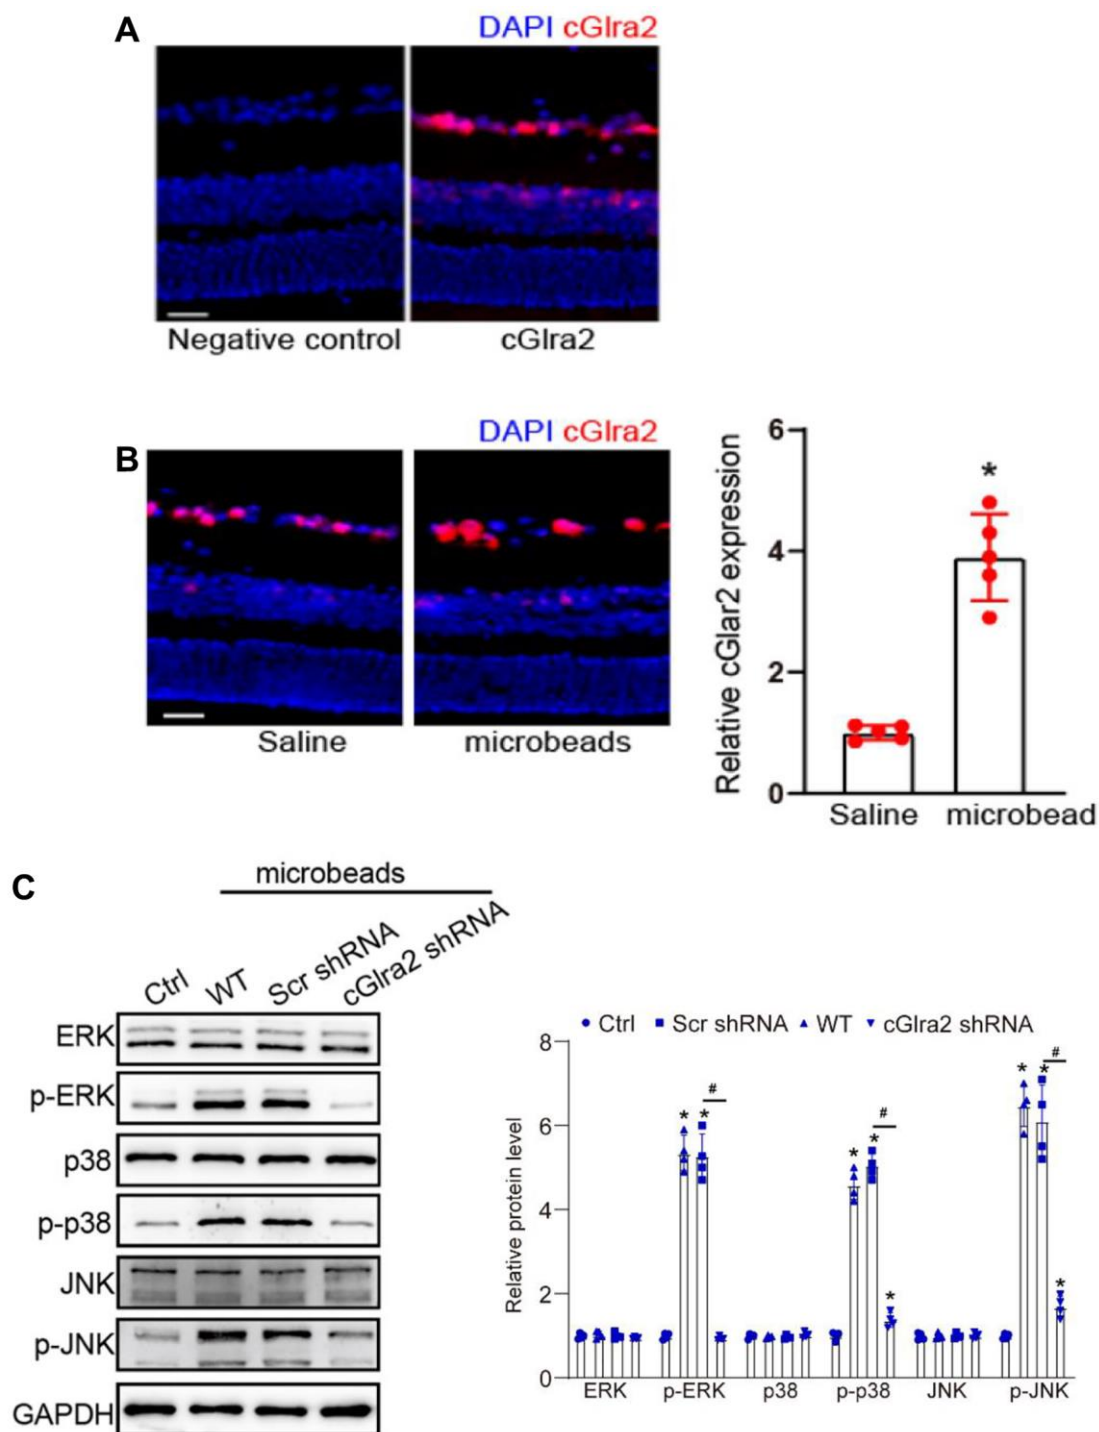

**Supplementary Figure 2. Detection of cGla2 expression in retinal tissues.** (A) The expression distribution of cGla2 in retinal tissues was detected by FISH assays. Red fluorescence represents the expression pattern of cGla2 and blue fluorescence is DAPI. Scale bar: 20  $\mu$ m. (B) FISH assays were conducted to compare the expression pattern of cGla2 between the microbeads-injected retinas and the saline-injected retinas. Scale bar: 20  $\mu$ m.  $n = 5$  animals. (C) Western blots were conducted to detect the expression levels of the members of MAPK signaling in saline-injected retinas (Ctrl), microbeads-injected retinas (WT), microbeads-injected retinas plus Scr shRNA, and microbeads-injected retinas plus cGla2 shRNA following 2-month after the induction of ocular hypertension. GAPDH was detected as the internal control ( $n = 4$  animals; \* $P < 0.05$  vs. saline-injected retinas; # $P < 0.05$  between the marked group; One-way ANOVA followed by Bonferroni's post hoc test).

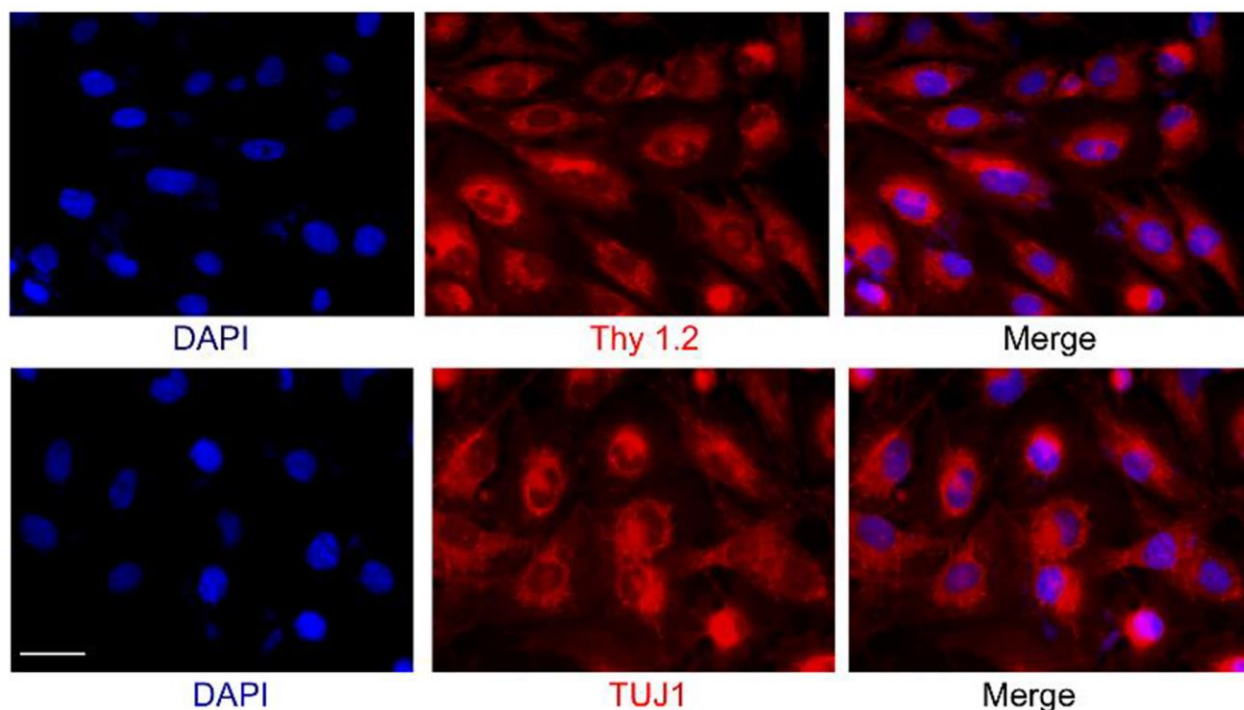

**Supplementary Figure 3. Identification of RGCs by immunofluorescence staining with Thy 1.2 and TUJ1.** Retinal ganglion cells (RGCs) derived from the newborn mouse retinas by the immunopanning-magnetic separation method. They were then stained with Thy 1.2 and TUJ1 to label RGCs. Nuclei were counterstained with 4',6-diamidino-2-phenylindole (DAPI). Scale bar: 20  $\mu$ m.

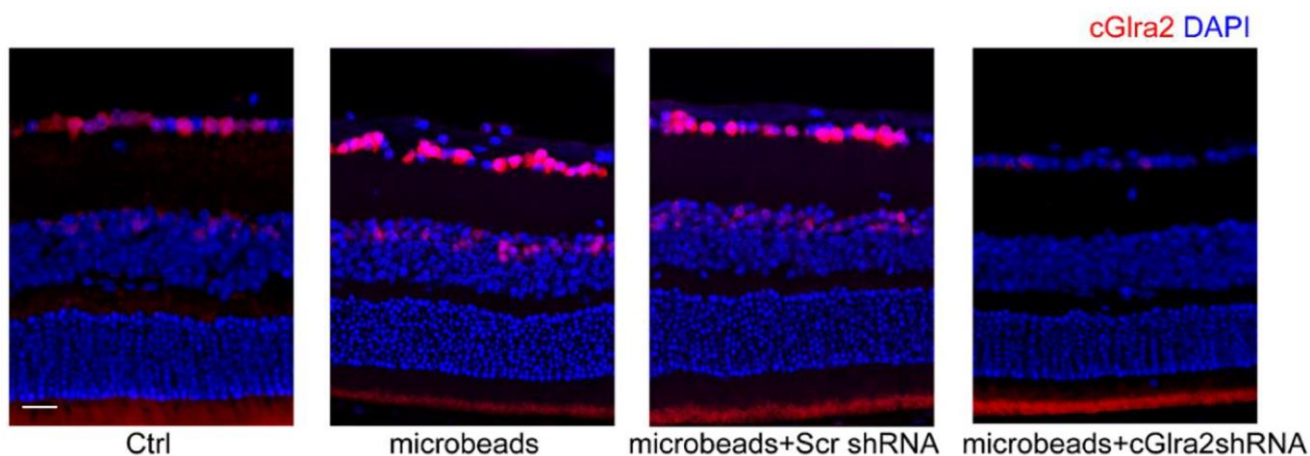

**Supplementary Figure 4. Detection of cGla2 expression distribution in different groups.** C57BL/6 mice received intravitreal injections of cGla2 shRNA, scrambled (Scr) shRNA, or left untreated (Ctrl) for 14 days. The expression distribution of cGla2 in retinal tissues was detected by FISH assays. Red fluorescence represents the expression pattern of cGla2 and blue fluorescence is DAPI. Scale bar: 50  $\mu$ m.

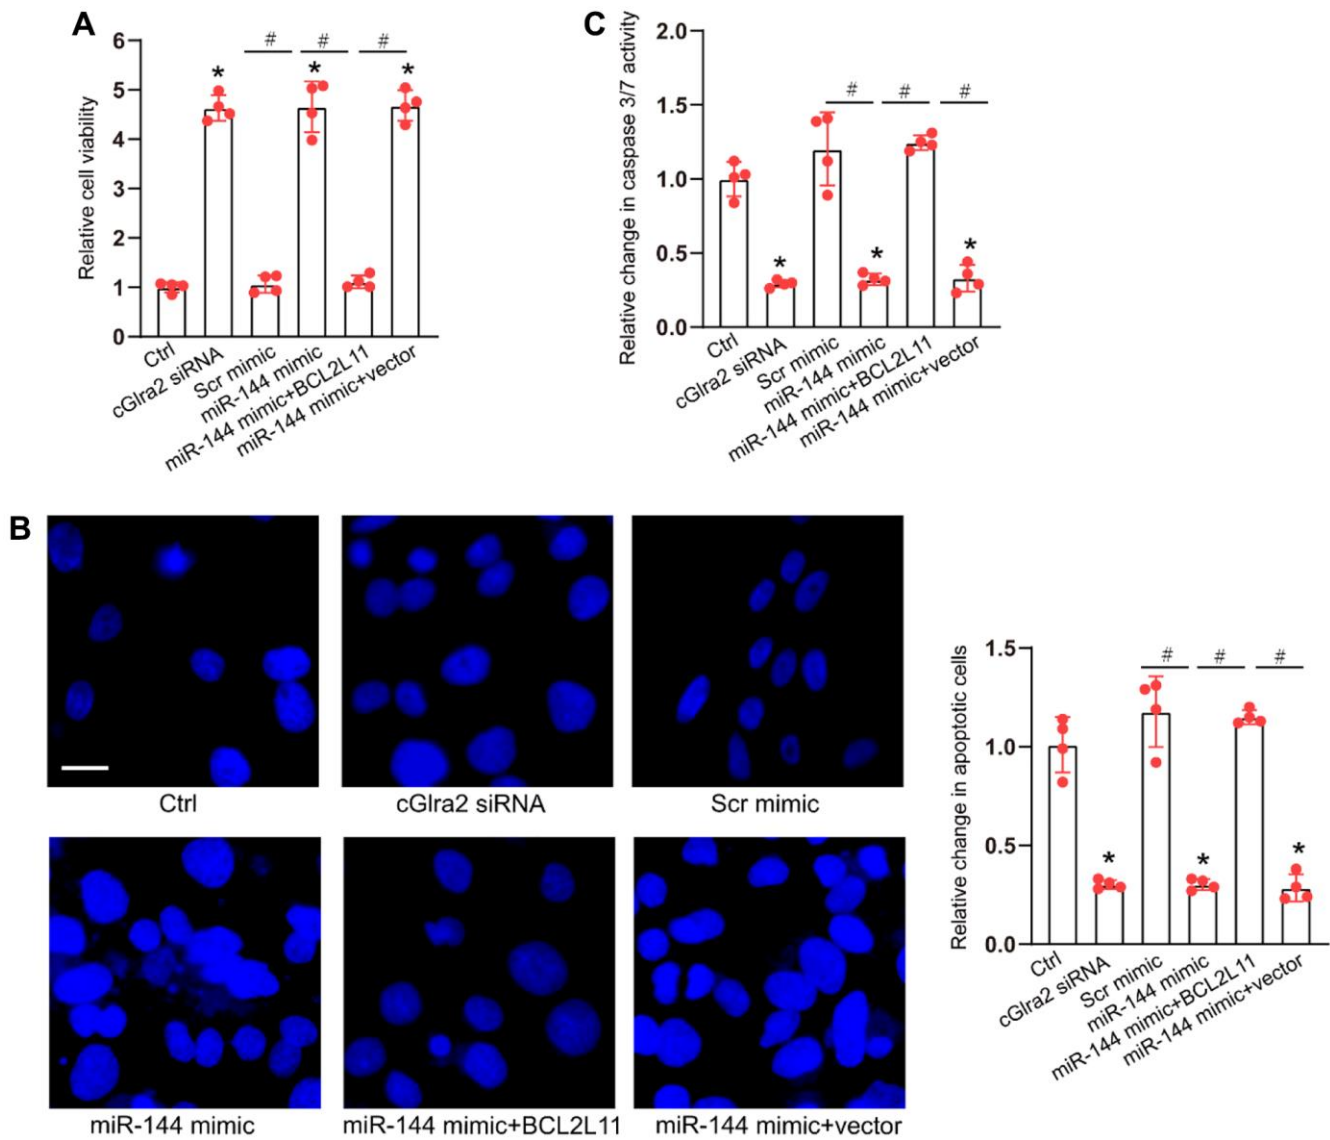

**Supplementary Figure 5. cGla2/miR-144/BCL2L11 signaling axis is involved in regulating RGC function following hydrostatic pressure.** (A–C) RGCs were transfected with Scr siRNA, cGla2 siRNA, scramble (Scr) mimic, miR-144 mimic, miR-144 mimic plus pcDNA3.1-BCL2L11, miR-144 mimic plus pcDNA3.1 (vector) or left untreated (Ctrl) for 12 h and then exposed to hydrostatic pressure for additional 36 h. RGCs were maintained under the elevated hydrostatic pressure (70 mm Hg) to induce hydrostatic stress. CCK-8 assays were performed to detect RGC viability (A,  $n = 4$  independent experiments). Hoechst staining and quantification analysis were performed to detect the changes of nuclei morphological characteristics of RGCs (B,  $n = 4$  independent experiments, Scale bar: 50  $\mu\text{m}$ ). Caspase 3/7 activity was performed to detect the degree of RGC apoptosis (C,  $n = 4$  independent experiments). \* $P < 0.05$  vs. Ctrl group; # $P < 0.05$  between the marked group. All significance was examined using One-way ANOVA followed by Bonferroni's post hoc test.
