# Supplementary material for: Targeting circular RNA-Glra2 alleviates retinal neurodegeneration induced by ocular hypertension
Source: Aging (Albany NY). 2023 Oct 10;15(19):10705–31. doi: 10.18632/aging.205108 (PMC10599745; doi:10.18632/aging.205108)
Supplement: Supplementary Table 2 [file aging-15-205108-s003.pdf]

## SUPPLEMENTARY TABLE

**Supplementary Table 2. Baseline demographics and characteristics of involved patients.**

|                             | <b>Glaucoma</b> | <b>Cataract</b> |
|-----------------------------|-----------------|-----------------|
| Age                         | 59.3 ± 7.5      | 62.8 ± 6.9      |
| Gender (Male/Female)        | 12/8            | 11/9            |
| IOP, mm Hg                  | 24.2 ± 3.9      | 10.5 ± 1.7      |
| Ocular comorbidity          | None            | None            |
| Eye laterality (Right/Left) | 13/7            | 8/12            |
